# Supplementary material
Source: MDPI journal article supplement (https://www.mdpi.com/search?q=marinedrugs-14-00180)
Supplement: s001 [file marinedrugs-14-00180-s001.pdf]

# Supplementary Materials: Bioactive Steroids from the Formosan Soft Coral *Umbellulifera petasites*

Chiung-Yao Huang, Che-Wei Chang, Yen-Ju Tseng, Jessica Lee, Ping-Jyun Sung, Jui-Hsin Su, Tsong-Long Hwang, Chang-Feng Dai, Hui-Chun Wang and Jyh-Horng Sheu

## List of Supplementary material:

| No        | Content                                                                   | Page |
|-----------|---------------------------------------------------------------------------|------|
| Figure S1 | HRESIMS spectrum of <b>1</b> .                                            | 2    |
| Figure S2 | <sup>1</sup> H NMR spectrum of <b>1</b> in CDCl <sub>3</sub> at 400 MHz.  | 3    |
| Figure S3 | <sup>13</sup> C NMR spectrum of <b>1</b> in CDCl <sub>3</sub> at 100 MHz. | 4    |
| Figure S4 | HRESIMS spectrum of <b>2</b> .                                            | 5    |
| Figure S5 | <sup>1</sup> H NMR spectrum of <b>2</b> in CDCl <sub>3</sub> at 400 MHz.  | 6    |
| Figure S6 | <sup>13</sup> C NMR spectrum of <b>2</b> in CDCl <sub>3</sub> at 100 MHz. | 7    |
| Figure S7 | HRESIMS spectrum of <b>3</b> .                                            | 8    |
| Figure S8 | <sup>1</sup> H NMR spectrum of <b>3</b> in CDCl <sub>3</sub> at 400 MHz.  | 9    |
| Figure S9 | <sup>13</sup> C NMR spectrum of <b>3</b> in CDCl <sub>3</sub> at 100 MHz. | 10   |

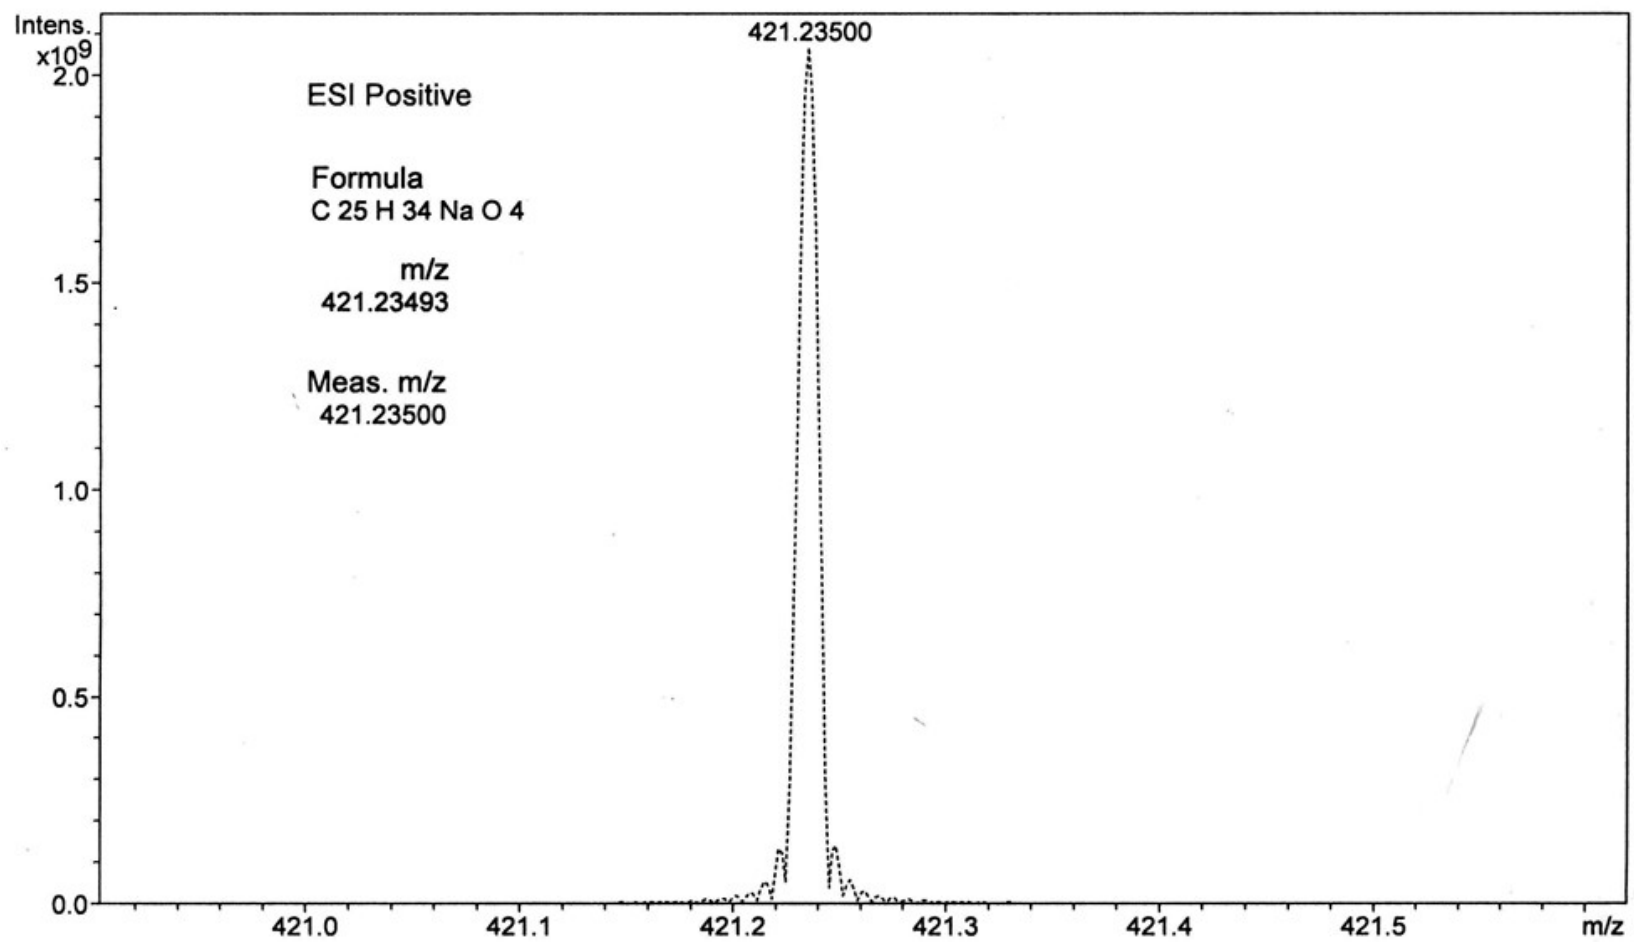

Figure S1. HRESIMS spectrum of 1.

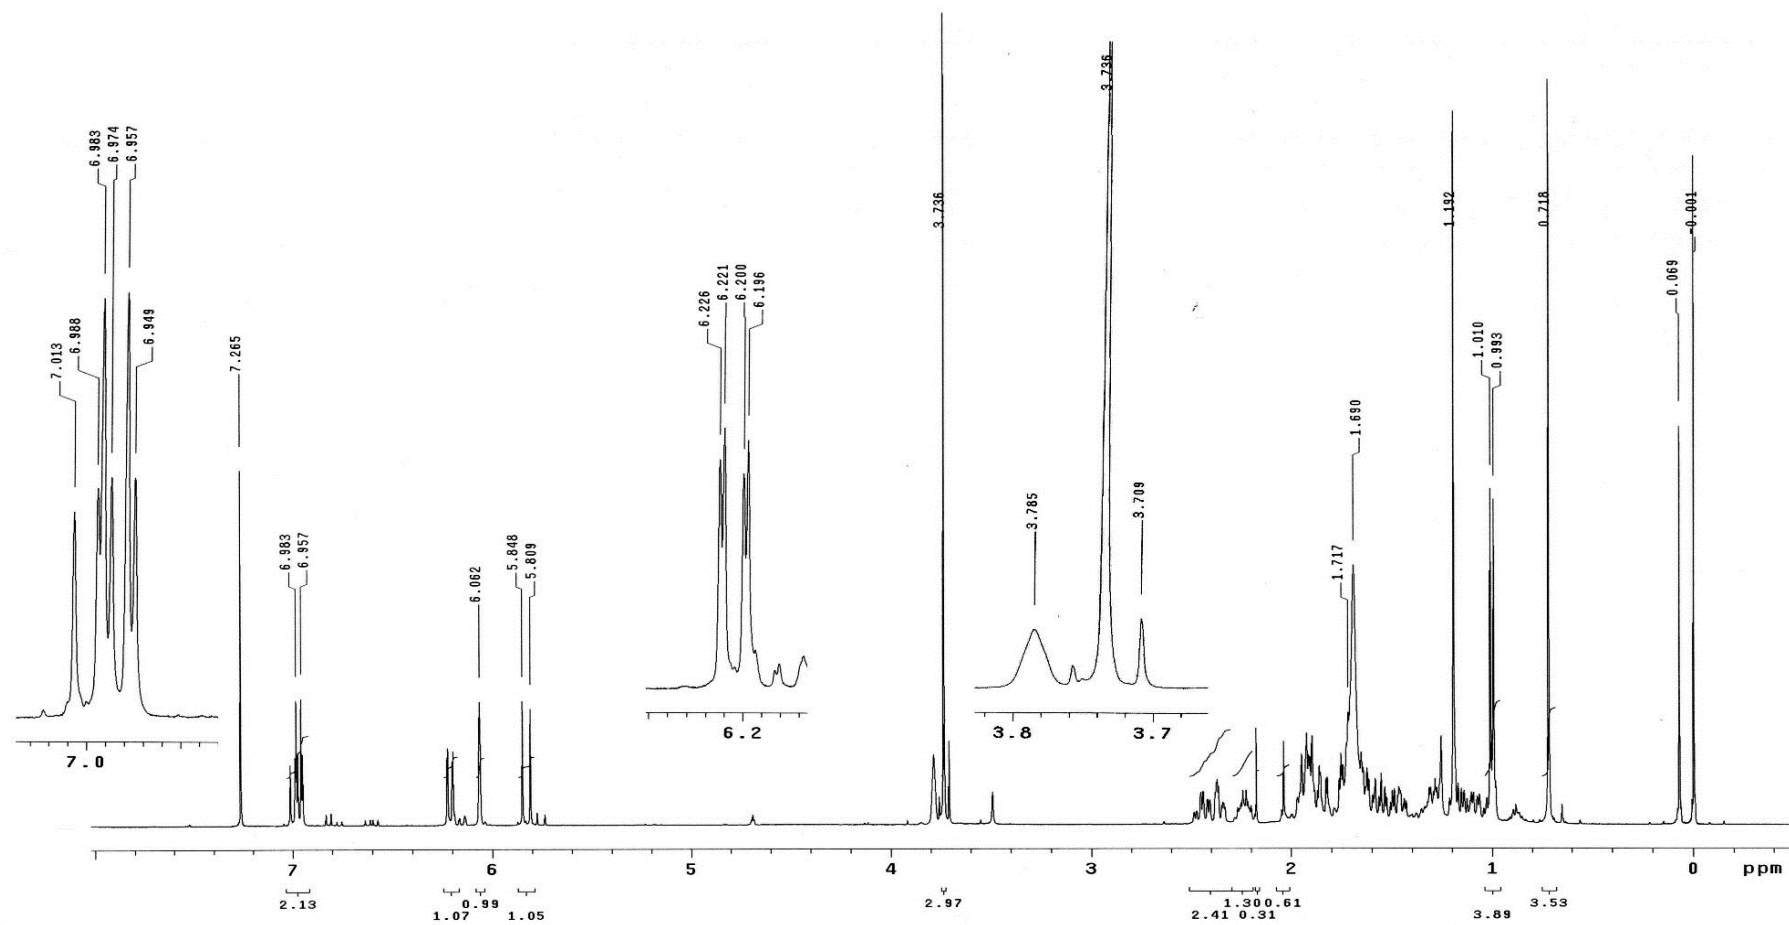Figure S2. <sup>1</sup>H NMR spectrum of 1 in CDCl<sub>3</sub> at 400 MHz.

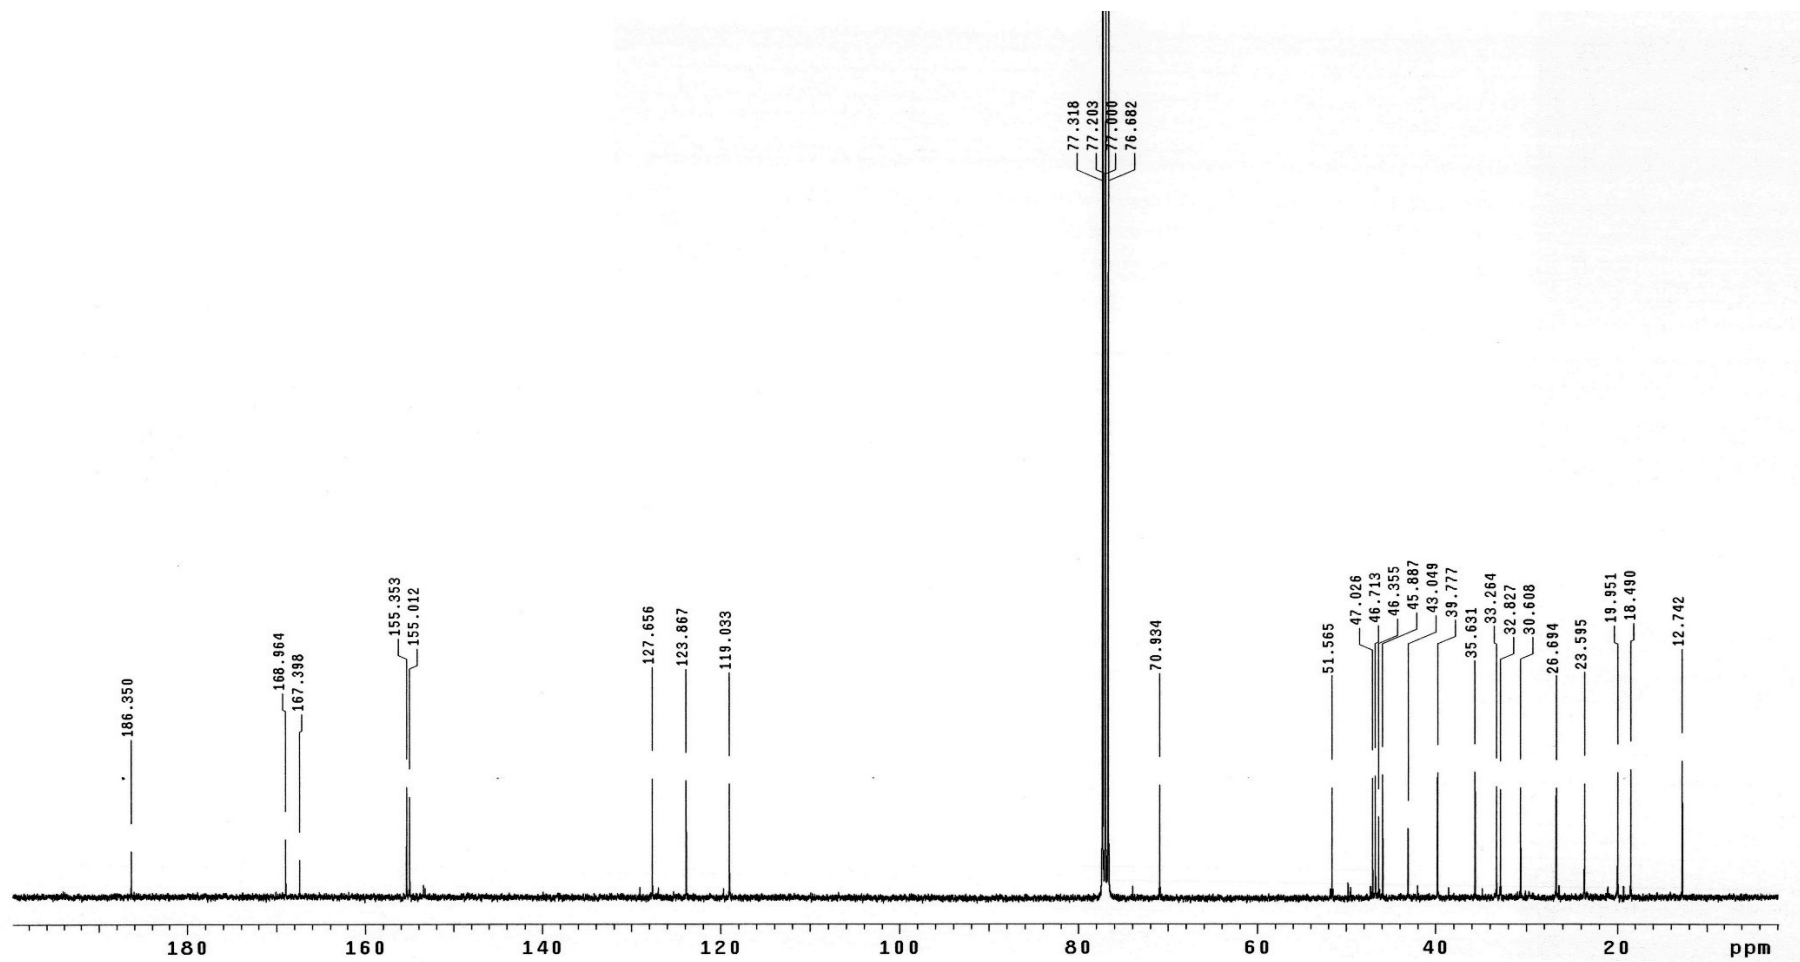

Figure S3.  $^{13}\text{C}$  NMR spectrum of 1 in  $\text{CDCl}_3$  at 100 MHz.

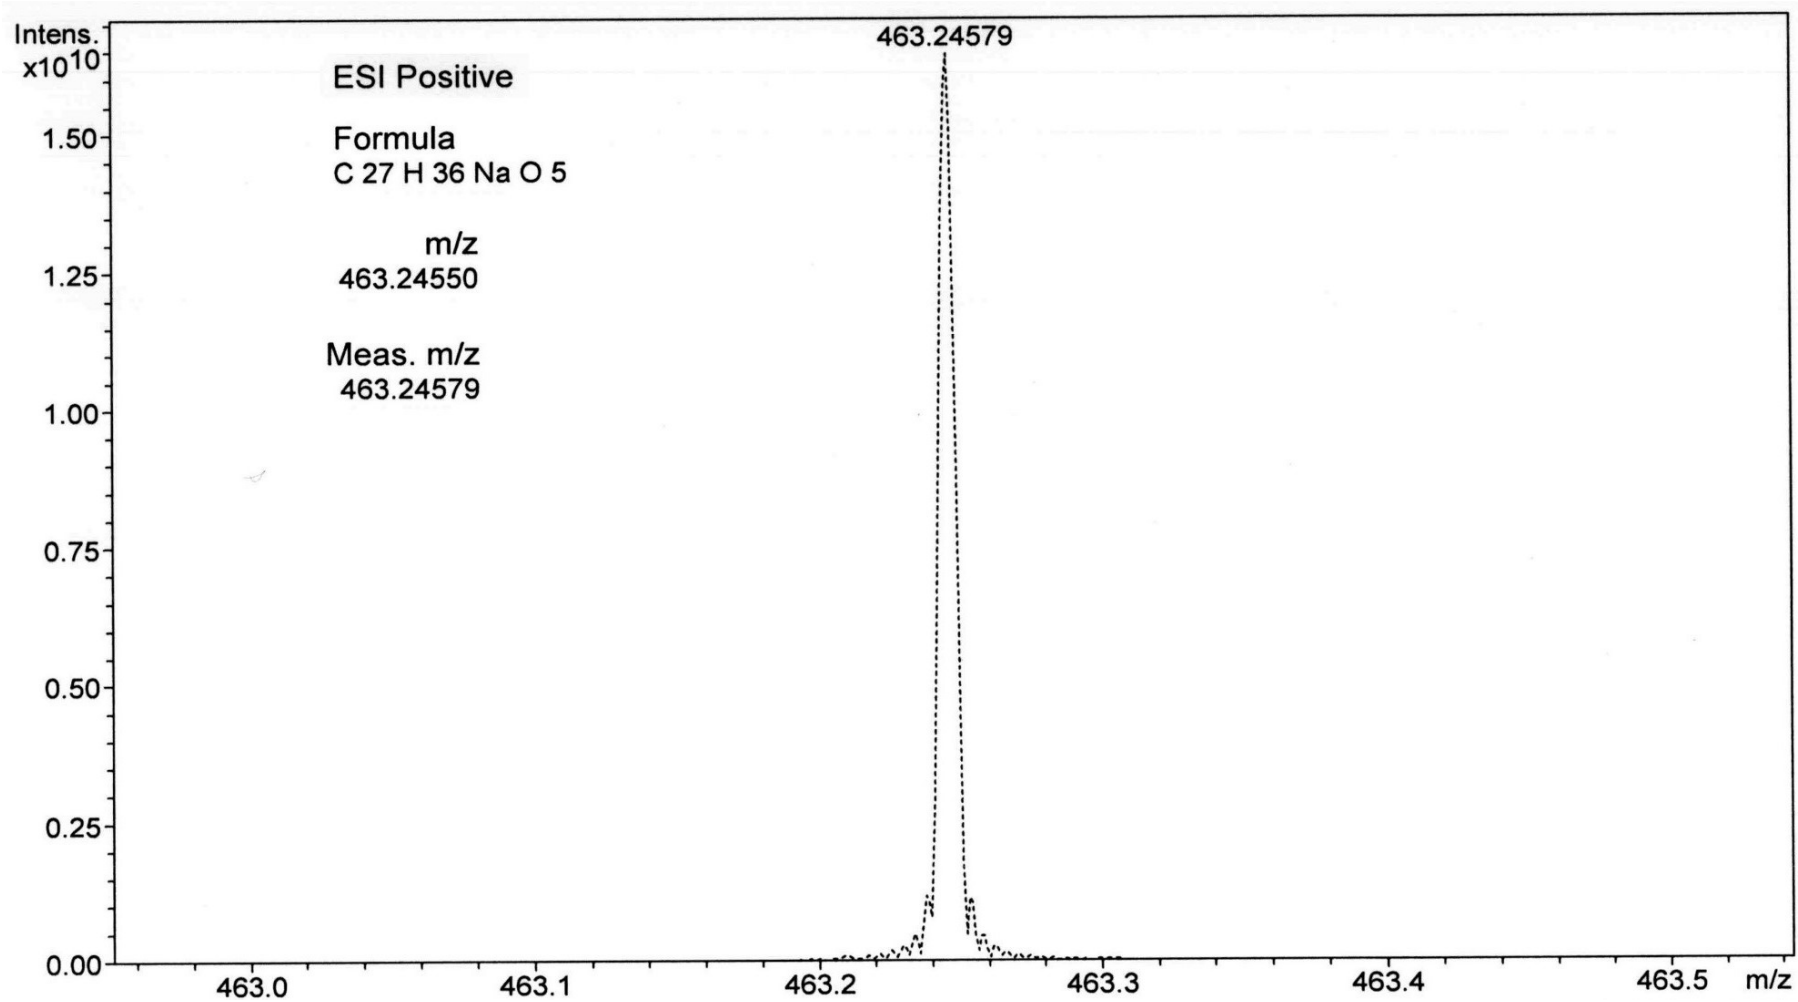

Figure S4. HRESIMS spectrum of 2.

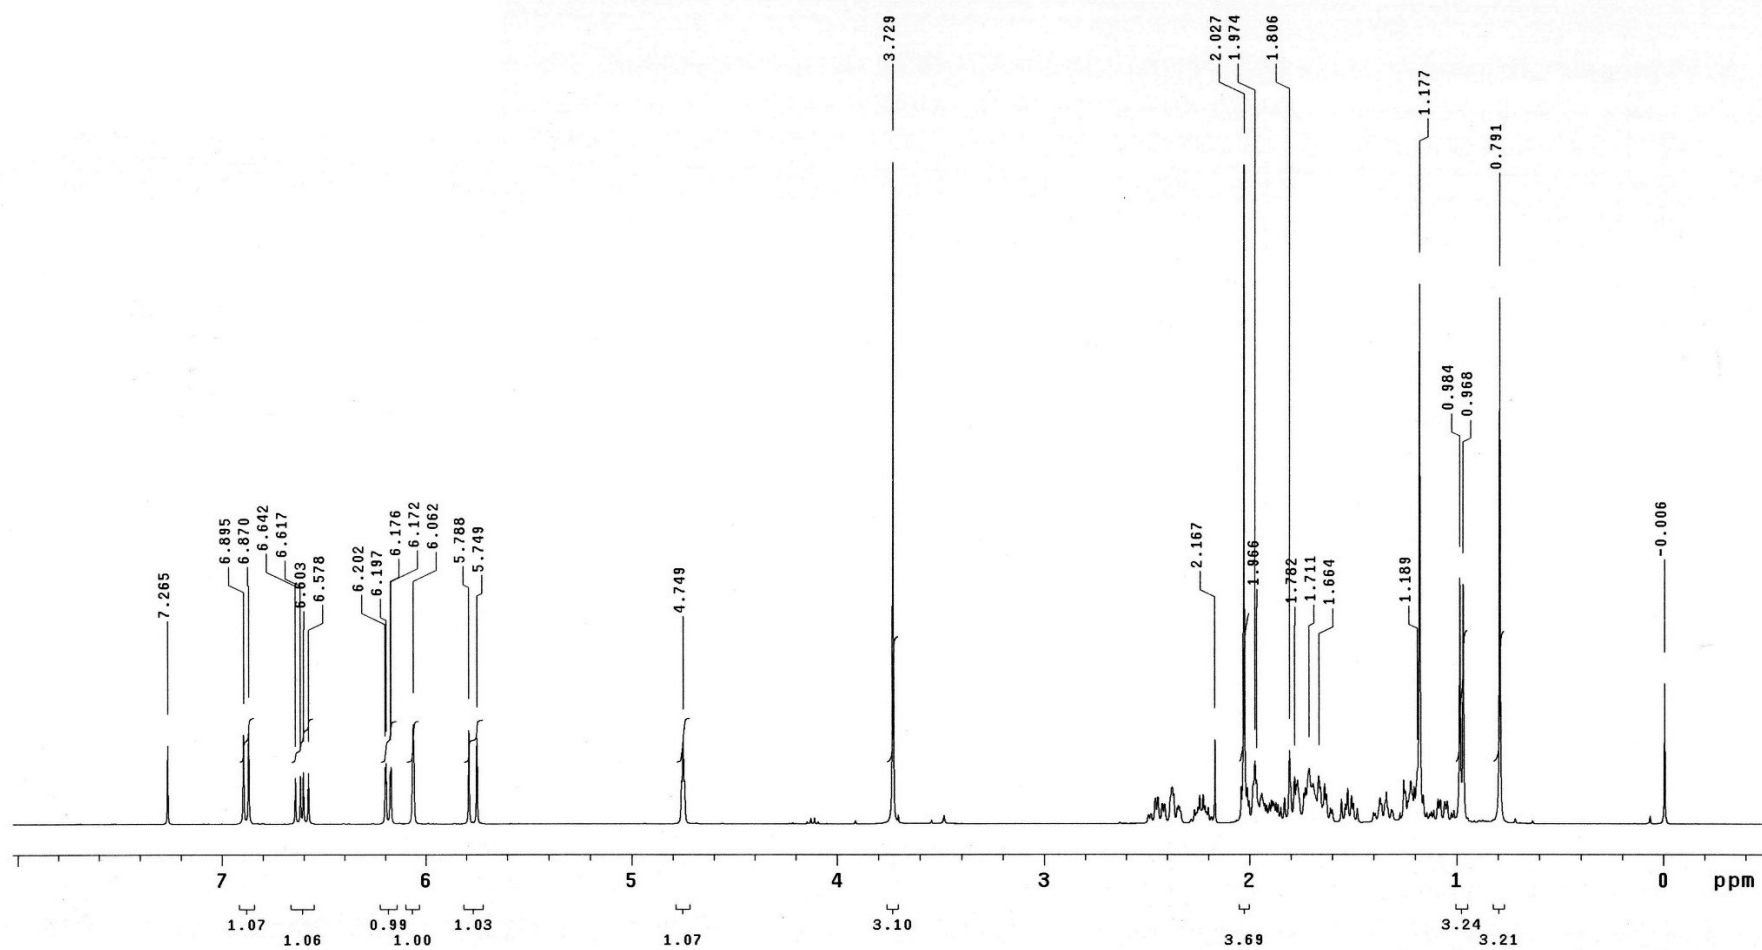Figure S5. <sup>1</sup>H NMR spectrum of 2 in CDCl<sub>3</sub> at 400 MHz.

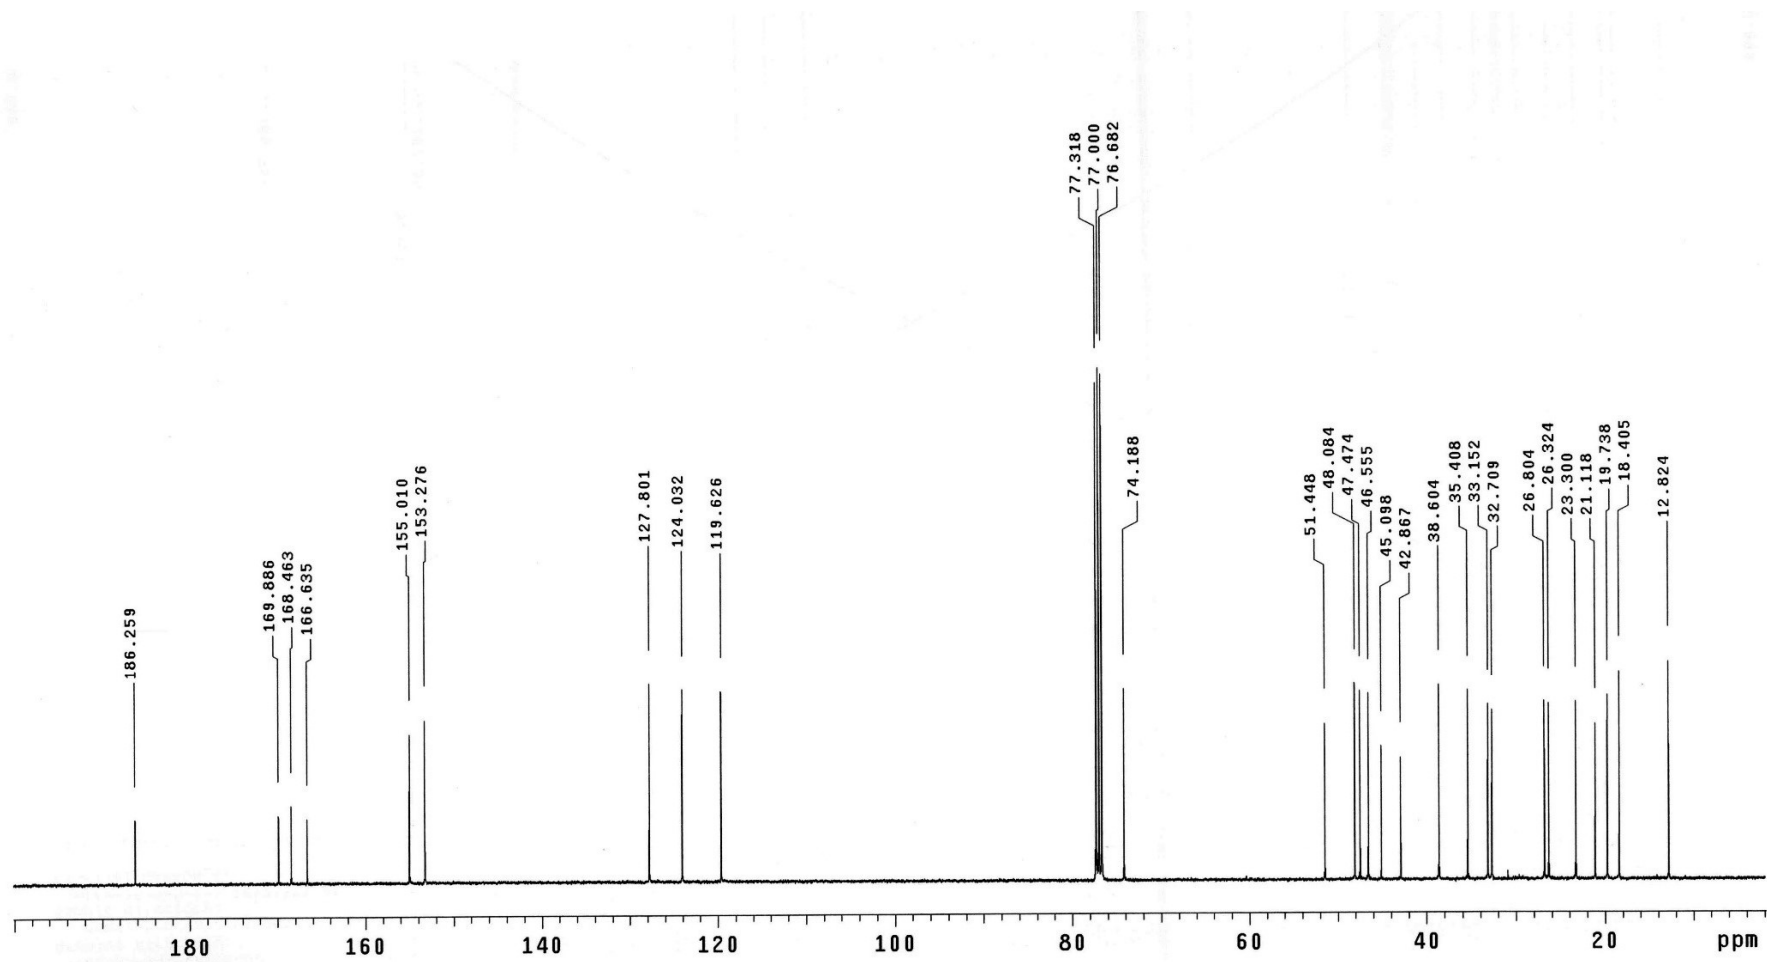

Figure S6. <sup>13</sup>C NMR spectrum of 2 in CDCl<sub>3</sub> at 100 MHz.

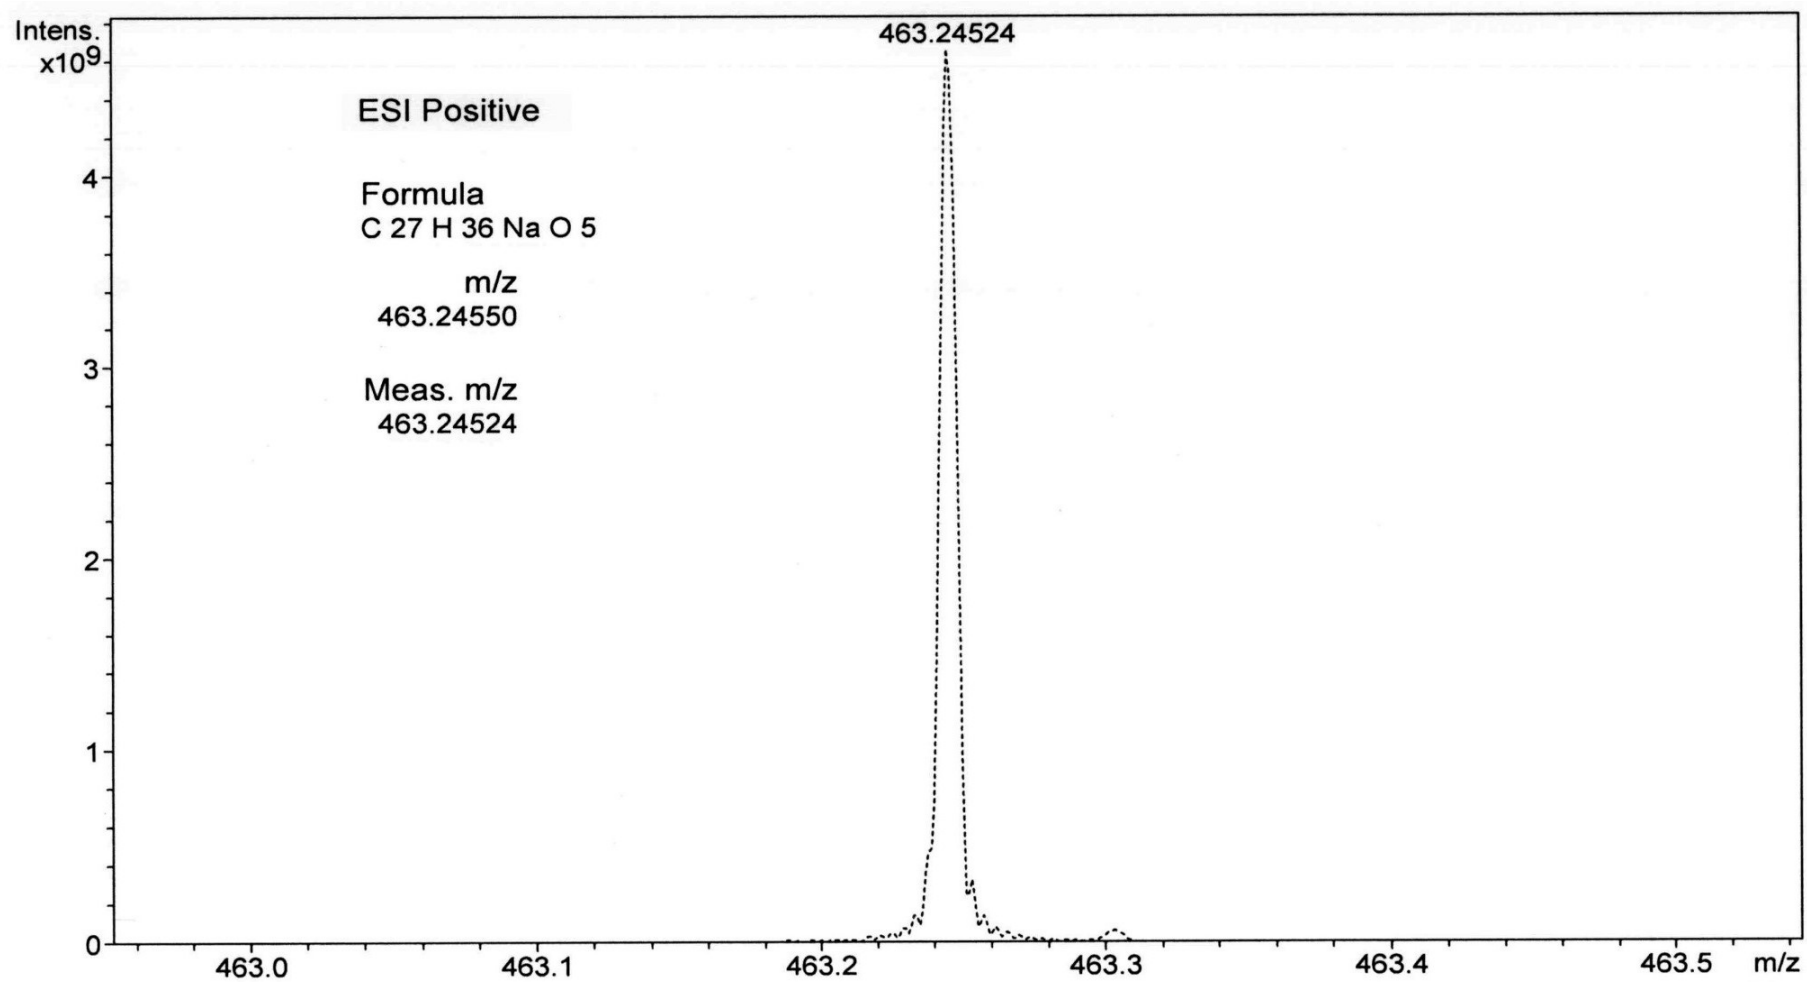

Figure S7. HRESIMS spectrum of 3.



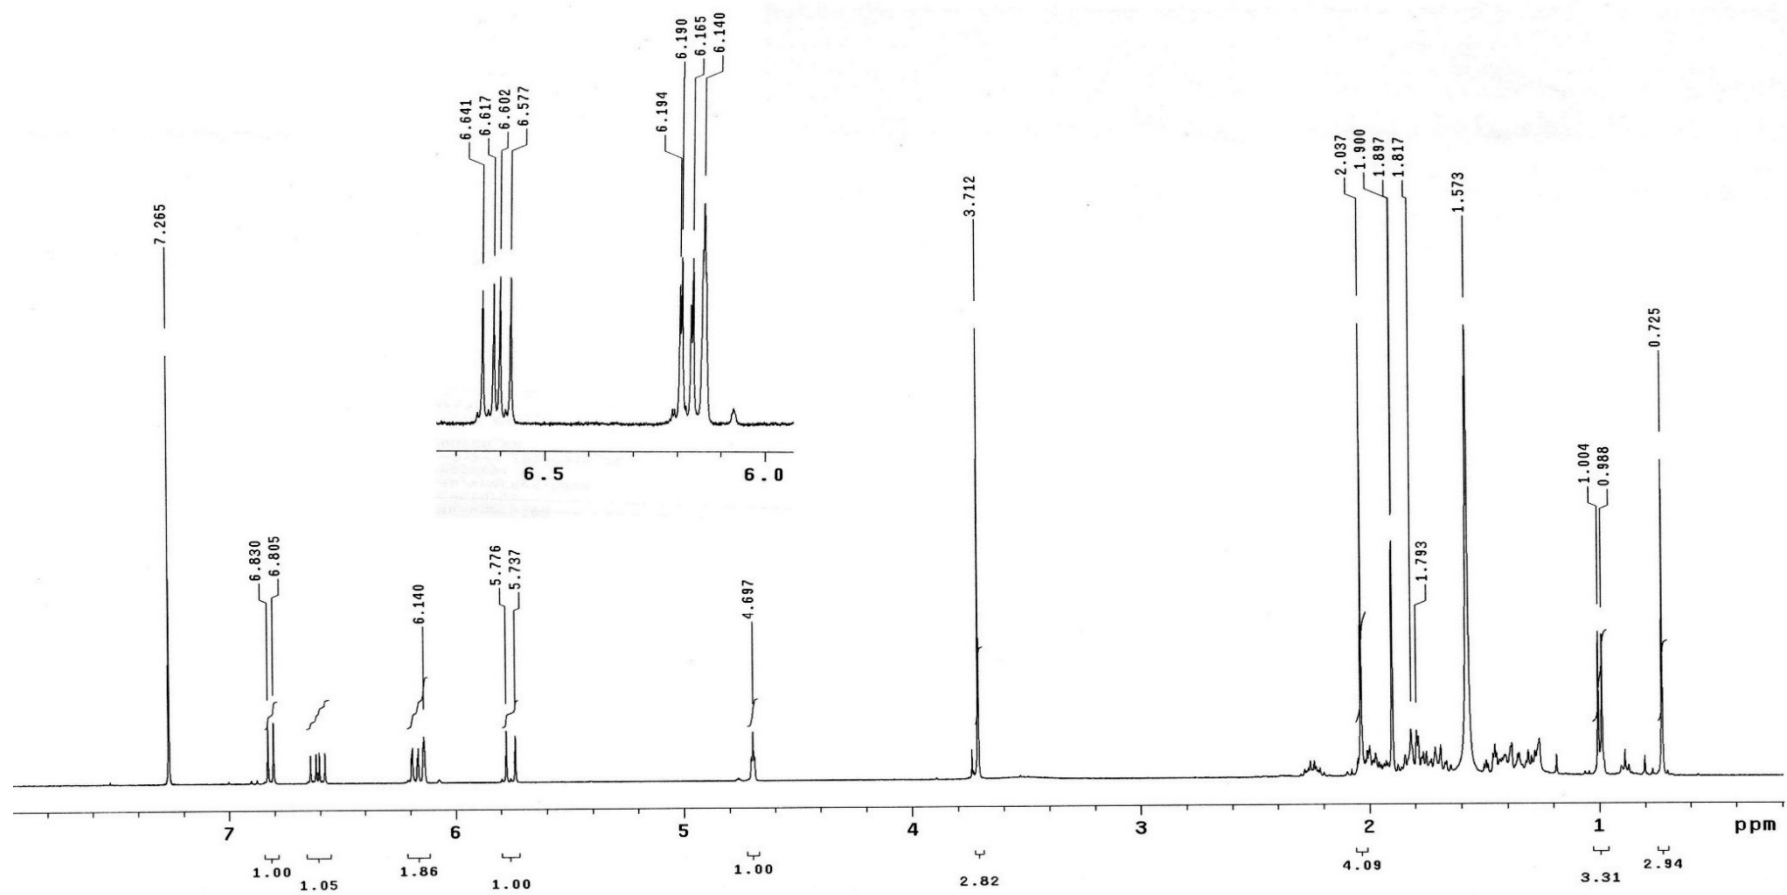

Figure S8. <sup>1</sup>H NMR spectrum of 3 in CDCl<sub>3</sub> at 400 MHz.

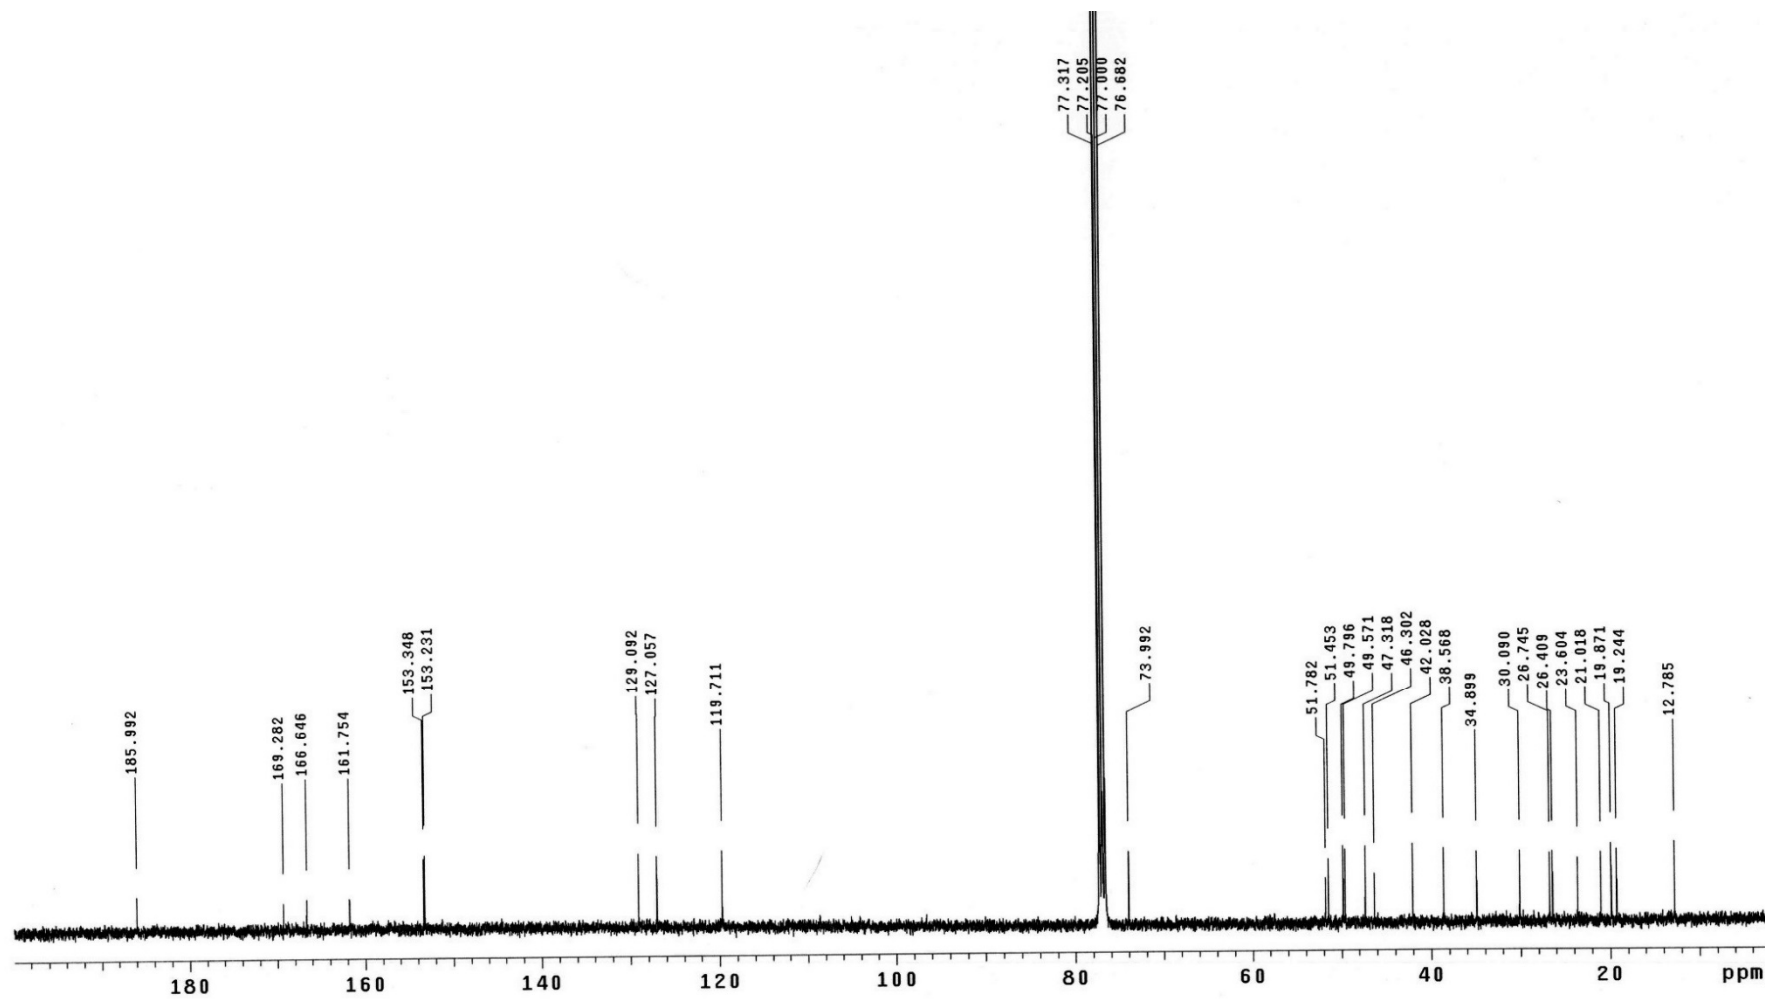

Figure S9.  $^{13}\text{C}$  NMR spectrum of 3 in  $\text{CDCl}_3$  at 100 MHz.
